# Supplementary material for: Reliability of Semiautomated Kinetic Perimetry (SKP) and Goldmann Kinetic Perimetry in Children and Adults With Retinal Dystrophies
Source: PubMed Central journal article supplement — Transl Vis Sci Technol. 2019 Jun 11;8(3):36. doi: 10.1167/tvst.8.3.36 (PMC6561130; doi:10.1167/tvst.8.3.36), 2019-06-11
Supplement: tvst-08-03-22_s01.pdf [file tvst-08-03-22_s01.pdf]

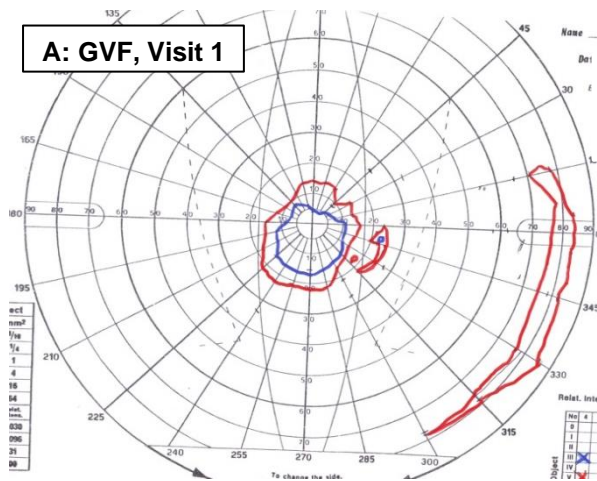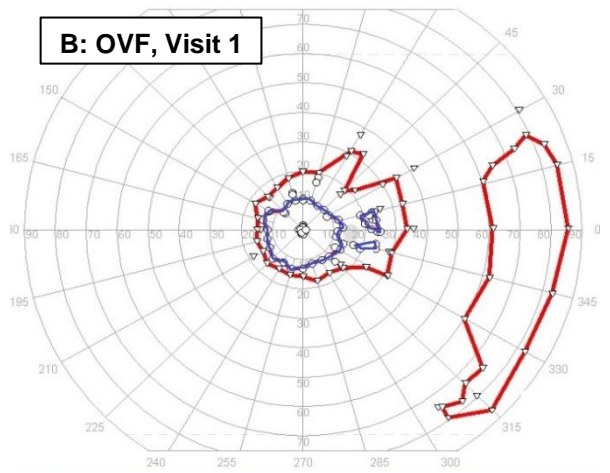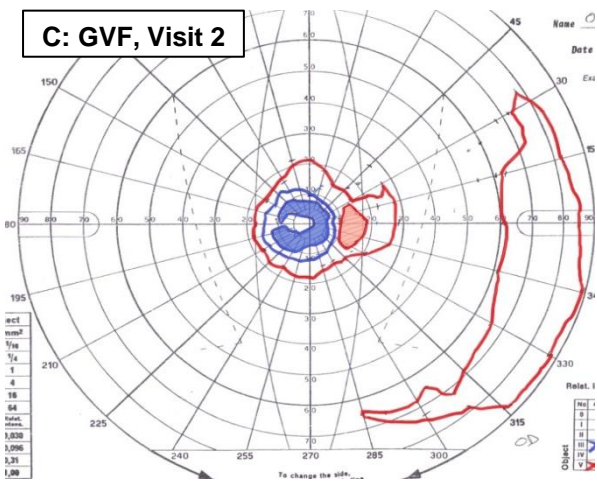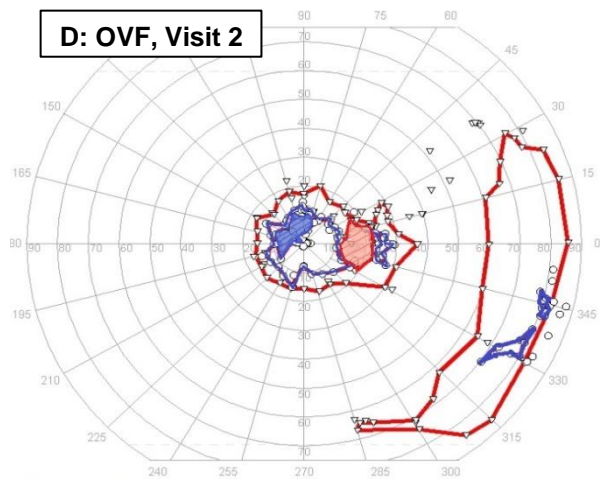

Participant C9: Visual Field Solid Angles (sr)

|         | GVF V4e | OVF V4e | GVF I4e | OVF I4e |
|---------|---------|---------|---------|---------|
| Visit 1 | 0.36    | 0.81    | 0.11    | 0.13    |
| Visit 2 | 0.83    | 0.82    | 0.07    | 0.13    |

Participant C9: Test-Retest Variability for Solid Angle Measures (%)

|     | GVF Visit 1 vs. Visit 2 | OVF Visit 1 vs. Visit 2 | GVF vs. OVF Visit 1 | GVF vs. OVF Visit 2 |
|-----|-------------------------|-------------------------|---------------------|---------------------|
| V4e | -77.9                   | -0.983                  | -76.2               | 1.09                |
| I4e | 42.2                    | 6.20                    | -19.8               | -55.1               |

**Supplementary Figure 1.** Example of dissimilar Goldmann and Octopus visual fields (GVFs and OVFs, respectively) from one participant, C9. Each panel shows the isopter for the III4e target (inner ring), and the isopter for the V4e target (outer ring). Scotomas in the subject's central field are marked with shading. Note the differences in the shapes within each type of test between Visits 1 and 2 (A versus C and B versus D, for GVFs and VFs, respectively), and between tests for the two perimeters on each visit (A versus B for Visit 1, and C versus D for Visit 2). The GVFs also differed in size between visits, and the GVFs and OVFs differed in size within visits. The corresponding numerical results are shown in the Tables.
