# Supplementary material for: Reliability of Semiautomated Kinetic Perimetry (SKP) and Goldmann Kinetic Perimetry in Children and Adults With Retinal Dystrophies
Source: PubMed Central journal article supplement — Transl Vis Sci Technol. 2019 Jun 11;8(3):36. doi: 10.1167/tvst.8.3.36 (PMC6561130; doi:10.1167/tvst.8.3.36), 2019-06-11
Supplement: tvst-08-03-22_s02.pdf [file tvst-08-03-22_s02.pdf]

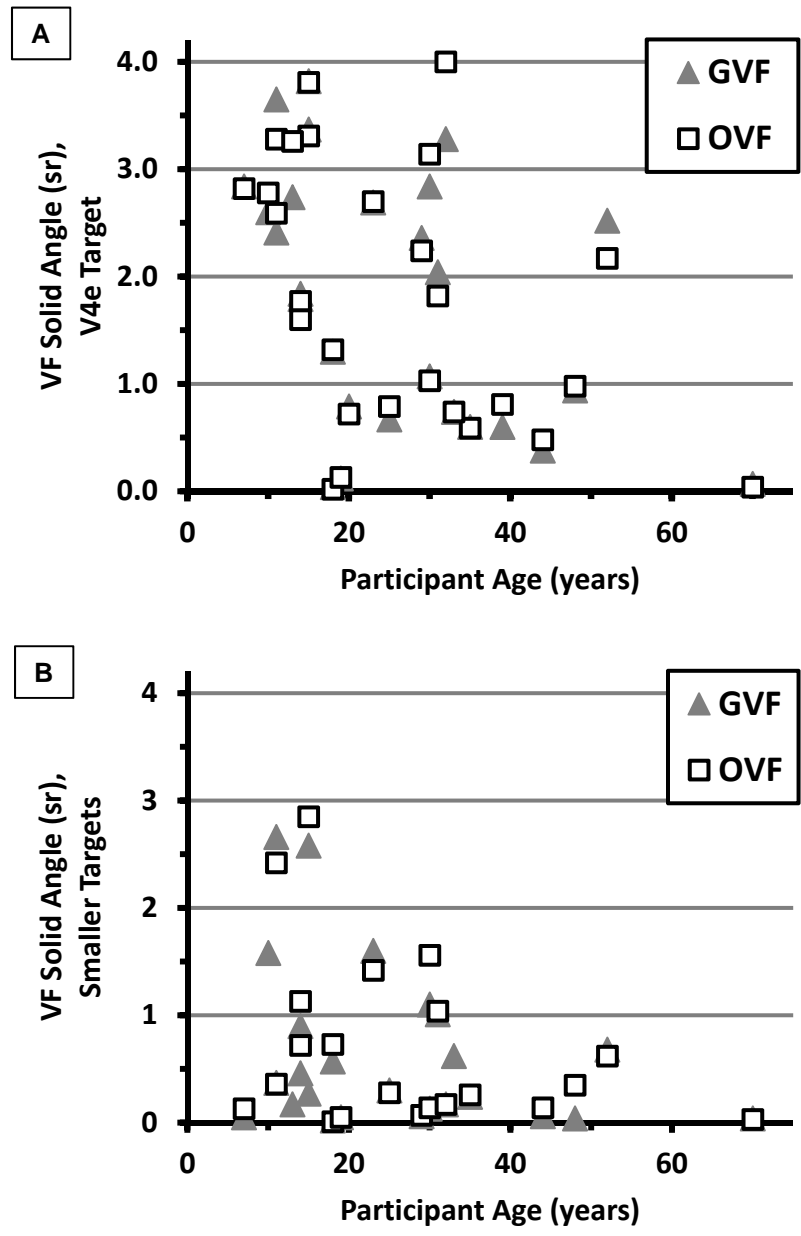

**Supplementary Figure 2:** Solid-angle measures, averaged across visits, as a function of participant age for the V4e target (A) and the smaller targets (B). The Goldmann visual field (GVF) results are represented by triangles and the Octopus visual field (OVF) results by open squares.
