# Supplementary material for: Reliability of Semiautomated Kinetic Perimetry (SKP) and Goldmann Kinetic Perimetry in Children and Adults With Retinal Dystrophies
Source: PubMed Central journal article supplement — Transl Vis Sci Technol. 2019 Jun 11;8(3):36. doi: 10.1167/tvst.8.3.36 (PMC6561130; doi:10.1167/tvst.8.3.36), 2019-06-11
Supplement: tvst-08-03-22_s03.pdf [file tvst-08-03-22_s03.pdf]

**Supplementary Table S1: Participant Demographics**

| Participant ID | Test eye | Visual acuity (Snellen) * | Visual Acuity (Snellen equivalent logMAR) | Diagnosis †        | Sex | Age (years) | Interval between visits (days) | Smaller visual field target tested ‡ |
|----------------|----------|---------------------------|-------------------------------------------|--------------------|-----|-------------|--------------------------------|--------------------------------------|
| A1             | OD       | 20/50                     | 0.40                                      | USH II             | M   | 29          | 6                              | II4e                                 |
| A2             | OS       | 20/160                    | 0.90                                      | LCA                | F   | 18          | 7                              | IV4e                                 |
| A3             | OS       | 20/40                     | 0.30                                      | cone-rod dystrophy | M   | 11          | 6                              | I4e                                  |
| A4             | OD       | 20/50                     | 0.40                                      | RP                 | F   | 10          | 18                             | III4e                                |
| A5             | OS       | 20/160                    | 0.90                                      | cone-rod dystrophy | F   | 15          | 7                              | III4e                                |
| A6             | OS       | 20/320                    | 1.20                                      | RP                 | F   | 19          | 3                              | III4e                                |
| A7             | OD       | 20/320                    | 1.20                                      | LCA                | M   | 14          | 6                              | III4e                                |
| A8 §           | OD       | 20/63                     | 0.50                                      | RP                 | M   | 14          | 4                              | III4e                                |
| A9             | OD       | 20/32                     | 0.20                                      | RP                 | M   | 48          | 20                             | III4e                                |
| A10            | OS       | 20/40                     | 0.30                                      | RP                 | F   | 70          | 2                              | III4e                                |
| B1 §           | OS       | 20/40                     | 0.30                                      | LCA, RDH12         | M   | 18          | 4                              | III4e                                |
| B2             | OD       | 20/40                     | 0.30                                      | 'asymmetric RP'    | M   | 35          | 6                              | II4e                                 |
| B3             | OS       | 20/40                     | 0.30                                      | RP                 | M   | 52          | 7                              | I4e                                  |
| B4             | OD       | 20/40                     | 0.30                                      | RP                 | F   | 23          | 7                              | I4e                                  |
| B5             | OD       | 20/25                     | 0.10                                      | RP                 | M   | 30          | 7                              | II4e                                 |
| B6             | OS       | 20/20                     | 0.00                                      | LCA                | F   | 30          | 7                              | II4e                                 |
| B7             | OS       | 20/400                    | 1.30                                      | LCA, CRB1          | F   | 14          | 7                              | III4e                                |
| B8             | OS       | 'count fingers'           | 1.85 "                                    | LCA, CRB1          | F   | 31          | 6                              | III4e                                |
| B9             | OD       | 'count fingers'           | 1.85 "                                    | LCA, CRB1          | M   | 44          | 7                              | IV4e                                 |

|     |    |       |       |       |   |    |   |       |
|-----|----|-------|-------|-------|---|----|---|-------|
| B10 | OD | 20/40 | 0.30  | ar-RP | F | 32 | 4 | I4e   |
| C1  | OS | 20/25 | 0.10  | RP    | F | 25 | 9 | III4e |
| C2  | OD | 20/46 | 0.36  | RP    | F | 20 | 7 | none  |
| C3  | OS | 20/21 | 0.02  | RP    | F | 11 | 9 | I4e   |
| C4  | OS | 20/23 | 0.06  | RP    | F | 13 | 7 | I4e   |
| C5  | OD | 20/23 | 0.06  | ar-RP | F | 18 | 7 | IV4e  |
| C6  | OD | 20/35 | 0.24  | ad-RP | F | 7  | 7 | I4e   |
| C7  | OD | 20/29 | 0.16  | ar-RP | F | 15 | 9 | I4e   |
| C8  | OD | 20/19 | -0.02 | ar-RP | F | 33 | 6 | III4e |
| C9  | OD | 20/42 | 0.32  | ad-RP | F | 39 | 8 | III4e |

\* The visual acuity values for the participants at Site B were taken from their recent medical charts, not measured at the study visits.

Visual acuities for the participants at the other two sites were measured at their first study visit.

† “USH II” = Usher syndrome II; “LCA” = Leber congenital amaurosis; “RP” = retinitis pigmentosa; “xl” = x-linked; “ar” = autosomal recessive; “ad” = autosomal dominant. Where known, the LCA gene mutation has been noted: “RDH12” = retinol dehydrogenase 12; “CRB1” = Crumbs 1.

‡ Perimetry targets used in addition to the V4e target.

§ These are the two participants whose OVF isopters (and some GVF isopters) were too small to be digitized.

|| The conversion to logMAR for these subjects was based on Schulze-Bonsel K, Feltgen N, Burau H, et al. Visual acuities “hand motion” and “counting fingers” can be quantified with the Freiburg visual acuity test. *Invest Ophthalmol Vis Sci* 2006;47:1236–40.
